# Supplementary material for: Differential Influence of Environmental Factors on Malaria Due to Vector Control Interventions in Uganda
Source: MDPI journal article supplement (doi:10.3390/ijerph20227042), 2023-11-09
Supplement: s1 [file s1]

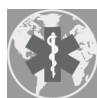

## Supplementary Materials

**Table S1.** – Description of intervention periods.

| Districts (MRC site)      | LLIN Coverage       | Description                                     | IRS Coverage         | Description                 |
|---------------------------|---------------------|-------------------------------------------------|----------------------|-----------------------------|
| <b>Kwania (Aduku)</b>     |                     |                                                 |                      |                             |
|                           | Jun 2014 – May 2016 | First LLIN distribution campaign + survivorship | Apr 2010 – Sept 2014 | 10 continuous rounds of IRS |
|                           | Mar 2017 – Dec 2018 | Second LLIN distribution campaign               | Oct 2014 – May 2017  | IRS withdrawal              |
|                           |                     |                                                 | June 2017 – Dec 2018 | 1 round of IRS              |
| <b>Rukiga (Kamwezi)</b>   |                     |                                                 |                      |                             |
|                           | Jun 2014 – May 2016 | First LLIN distribution campaign + survivorship |                      |                             |
|                           | Jul 2017 – Dec 2018 | Second LLIN distribution campaign               |                      |                             |
| <b>Kanungu (Kihikihi)</b> |                     |                                                 |                      |                             |
|                           | Jun 2014 – May 2016 | First LLIN distribution campaign + survivorship |                      |                             |
|                           | Jul 2017 – Dec 2018 | Second LLIN distribution campaign               |                      |                             |
| <b>Mubende (Kasambya)</b> |                     |                                                 |                      |                             |
|                           | Dec 2013 – Nov 2015 | First LLIN distribution campaign + survivorship |                      |                             |
|                           | Dec 2017 – Dec 2018 | Second LLIN distribution campaign               |                      |                             |
| <b>Tororo (Nagongera)</b> |                     |                                                 |                      |                             |
|                           | Dec 2013 – Nov 2015 | First LLIN distribution campaign + survivorship | Feb 2015 – Dec 2018  | 6 rounds of IRS             |
|                           | Jun 2017 – Dec 2018 | Second LLIN distribution campaign               |                      |                             |
| <b>Jinja (Walukuba)</b>   |                     |                                                 |                      |                             |
|                           | Dec 2013 – Nov 2015 | First LLIN distribution campaign                |                      |                             |
|                           | Jun 2017 – Dec 2018 | Second LLIN distribution campaign               |                      |                             |

**Table S2.** – Description of the final GLM models used for analysis.

| <b>Final models</b> | <b>Averaging period<br/>for environmental<br/>variables</b> | <b>Covariates</b>                                                                                                                                                                                                                                                                                                              |
|---------------------|-------------------------------------------------------------|--------------------------------------------------------------------------------------------------------------------------------------------------------------------------------------------------------------------------------------------------------------------------------------------------------------------------------|
| Pooled model 1      | 3 months                                                    | s(rainfall) + s(minimum temperature) + s(maximum temperature) + s(humidity) + s(EVI) + IRS + LLIN + average income + site + offset(number of visit at health centers)                                                                                                                                                          |
| Pooled model 2      | 3 months                                                    | s(rainfall) + s(minimum temperature) + s(maximum temperature) + s(humidity) + s(EVI) + IRS + LLIN + average income + site + s(minimum temperature)*IRS + s(EVI)*IRS + s(humidity)*IRS + s(rainfall)*LLIN + s(minimum temperature)*LLIN + s(maximum temperature)*LLIN + s(EVI)*LLIN + offset(number of visit at health centers) |
| Aduku               | 4 months                                                    | Rainfall + s(minimum temperature) + s(maximum temperature) + humidity + s(EVI) + IRS + LLIN + average income + offset(number of visit at the health center)                                                                                                                                                                    |
| Kamwezi             | 4 months                                                    | s(rainfall)+ minimum temperature + maximum temperature + humidity + s(EVI) + IRS + LLIN + average income + offset(number of visit at the health center)                                                                                                                                                                        |
| Kasambya            | 4 months                                                    | s(rainfall) + minimum temperature + s(maximum temperature) + s(humidity) + s(EVI) + IRS + LLIN + average income + offset(number of visit at the health center)                                                                                                                                                                 |
| Kihihi              | 2 months                                                    | s(rainfall) + minimum temperature + maximum temperature + humidity + s(EVI) + IRS + LLIN + average income + offset(number of visit at the health center)                                                                                                                                                                       |
| Nagongera           | 4 months                                                    | s(rainfall) + s(minimum temperature) + maximum temperature + humidity + EVI + IRS + LLIN + average income + offset(number of visit at the health center)                                                                                                                                                                       |
| Walukuba            | 4 months                                                    | Rainfall + s(minimum temperature) + maximum temperature + s(humidity) + EVI + IRS + LLIN + average income + offset(number of visit at the health center)                                                                                                                                                                       |

s represents the spline function ; EVI : enhanced vegetation index; IRS : indoor residual spraying; long-lasting insecticidal nets (LLIN).

**Table S3. -** Distribution of environmental factors between 2010 - 2018.

|                                             | Aduku<br>( <i>n</i> <sub>week</sub><br>=469) | Kamwezi<br>( <i>n</i> <sub>week</sub><br>=461) | Kasamby<br>a<br>( <i>n</i> <sub>week</sub><br>=470) | Kihihi<br>( <i>n</i> <sub>week</sub><br>=469) | Nagonger<br>a<br>( <i>n</i> <sub>week</sub><br>=470) | Walukub<br>a<br>( <i>n</i> <sub>week</sub><br>=448) | Overall<br>( <i>n</i> <sub>total</sub><br>=2787) |
|---------------------------------------------|----------------------------------------------|------------------------------------------------|-----------------------------------------------------|-----------------------------------------------|------------------------------------------------------|-----------------------------------------------------|--------------------------------------------------|
| Cumulative rainfall<br>(mm - 1 month)       |                                              |                                                |                                                     |                                               |                                                      |                                                     |                                                  |
| Mean (SD)                                   | 95.5 (56.3)                                  | 63.0 (45.5)                                    | 88.6 (48.3)                                         | 87.8 (53.9)                                   | 121 (71.5)                                           | 99.4 (60.0)                                         | 92.6 (59.1)                                      |
| Median [Min,<br>Max]                        | 101 [0,<br>267]                              | 60.0 [0,<br>308]                               | 86.5 [1.10,<br>227]                                 | 84.2 [0,<br>278]                              | 115 [0.979,<br>314]                                  | 88.2 [3.24,<br>319]                                 | 85.8 [0,<br>319]                                 |
| Minimum<br>temperatures<br>(°C - 1 month)   |                                              |                                                |                                                     |                                               |                                                      |                                                     |                                                  |
| Mean (SD)                                   | 21.1<br>(0.761)                              | 14.5 (0.486)                                   | 17.7<br>(0.605)                                     | 16.2 (0.594)                                  | 17.5 (0.676)                                         | 19.5<br>(0.603)                                     | 17.8 (2.22)                                      |
| Median [Min,<br>Max]                        | 21.1 [19.7,<br>23.8]                         | 14.5 [13.1,<br>16.0]                           | 17.7 [16.4,<br>19.8]                                | 16.3 [14.6,<br>17.8]                          | 17.5 [14.8,<br>19.1]                                 | 19.6 [18.0,<br>21.5]                                | 17.6 [13.1,<br>23.8]                             |
| Maximum<br>temperatures<br>(°C - 1 month)   |                                              |                                                |                                                     |                                               |                                                      |                                                     |                                                  |
| Mean (SD)                                   | 28.7 (1.66)                                  | 23.5 (0.828)                                   | 27.7 (1.34)                                         | 25.8 (0.758)                                  | 27.8 (1.36)                                          | 26.7 (1.00)                                         | 26.7 (2.08)                                      |
| Median [Min,<br>Max]                        | 28.1 [26.5,<br>33.5]                         | 23.4 [21.9,<br>26.2]                           | 27.3 [25.5,<br>32.1]                                | 25.7 [24.0,<br>28.2]                          | 27.4 [25.7,<br>32.2]                                 | 26.4 [25.0,<br>30.8]                                | 26.8 [21.9,<br>33.5]                             |
| Humidity<br>(kg.kg <sup>-1</sup> – 1 month) |                                              |                                                |                                                     |                                               |                                                      |                                                     |                                                  |
| Mean (SD)                                   | 0.0146<br>(0.000977)                         | 0.0133<br>(0.00248)                            | 0.0145<br>(0.00121)                                 | 0.0129<br>(0.00225)                           | 0.0134<br>(0.00201)                                  | 0.0144<br>(0.00122)                                 | 0.0138<br>(0.00191)                              |
| Median [Min,<br>Max]                        | 0.0147<br>[0.0116,<br>0.0164]                | 0.0145<br>[0.00714,<br>0.0166]                 | 0.0147<br>[0.0112,<br>0.0166]                       | 0.0139<br>[0.00724,<br>0.0158]                | 0.0136<br>[0.00873,<br>0.0179]                       | 0.0146<br>[0.0112,<br>0.0168]                       | 0.0144<br>[0.00714,<br>0.0179]                   |
| Enhanced<br>vegetation index (1<br>month)   |                                              |                                                |                                                     |                                               |                                                      |                                                     |                                                  |
| Mean (SD)                                   | 0.386<br>(0.0825)                            | 0.414<br>(0.0357)                              | 0.435<br>(0.0554)                                   | 0.459<br>(0.0416)                             | 0.379<br>(0.0590)                                    | 0.371<br>(0.0544)                                   | 0.408<br>(0.0651)                                |
| Median [Min,<br>Max]                        | 0.393<br>[0.219,<br>0.519]                   | 0.407<br>[0.361,<br>0.496]                     | 0.435<br>[0.279,<br>0.505]                          | 0.465<br>[0.389,<br>0.539]                    | 0.383<br>[0.221,<br>0.469]                           | 0.394<br>[0.231,<br>0.457]                          | 0.408<br>[0.219,<br>0.539]                       |
| Cumulative rainfall<br>(mm - 2 months)      |                                              |                                                |                                                     |                                               |                                                      |                                                     |                                                  |
| Mean (SD)                                   | 191 (94.0)                                   | 126 (76.7)                                     | 177 (80.1)                                          | 175 (89.5)                                    | 242 (118)                                            | 200 (96.6)                                          | 185 (99.6)                                       |
| Median [Min,<br>Max]                        | 205 [0.118,<br>463]                          | 123 [0.330,<br>465]                            | 181 [13.8,<br>337]                                  | 175 [9.63,<br>464]                            | 243 [8.27,<br>566]                                   | 186 [13.9,<br>546]                                  | 177 [0.118,<br>566]                              |
| Minimum<br>temperatures<br>(°C - 2 months)  |                                              |                                                |                                                     |                                               |                                                      |                                                     |                                                  |

|                                              |                   |                            |                             |                            |                             |                             |                            |                             |
|----------------------------------------------|-------------------|----------------------------|-----------------------------|----------------------------|-----------------------------|-----------------------------|----------------------------|-----------------------------|
| Maximum temperatures<br>(°C - 2 months)      | Mean (SD)         | 21.1<br>(0.711)            | 14.5 (0.439)                | 17.7<br>(0.550)            | 16.2 (0.535)                | 17.5 (0.613)                | 19.5<br>(0.548)            | 17.8 (2.20)                 |
|                                              | Median [Min, Max] | 21.1 [19.9, 23.6]          | 14.5 [13.6, 15.7]           | 17.6 [16.6, 19.8]          | 16.3 [15.0, 17.7]           | 17.5 [15.2, 19.0]           | 19.6 [18.3, 21.5]          | 17.6 [13.6, 23.6]           |
|                                              |                   |                            |                             |                            |                             |                             |                            |                             |
| Humidity<br>(kg.kg <sup>-1</sup> - 2 months) | Mean (SD)         | 28.7 (1.52)                | 23.5 (0.700)                | 27.7 (1.18)                | 25.8 (0.613)                | 27.8 (1.21)                 | 26.7<br>(0.870)            | 26.7 (2.00)                 |
|                                              | Median [Min, Max] | 28.2 [26.7, 33.4]          | 23.5 [22.2, 25.4]           | 27.4 [25.6, 31.1]          | 25.8 [24.5, 27.3]           | 27.4 [26.1, 31.9]           | 26.5 [25.2, 29.7]          | 26.8 [22.2, 33.4]           |
|                                              |                   |                            |                             |                            |                             |                             |                            |                             |
| Enhanced vegetation index (2 months)         | Mean (SD)         | 0.0146<br>(0.000874)       | 0.0133<br>(0.00235)         | 0.0145<br>(0.00111)        | 0.0129<br>(0.00212)         | 0.0134<br>(0.00185)         | 0.0144<br>(0.00111)        | 0.0138<br>(0.00180)         |
|                                              | Median [Min, Max] | 0.0148<br>[0.0123, 0.0164] | 0.0143<br>[0.00770, 0.0164] | 0.0147<br>[0.0116, 0.0165] | 0.0138<br>[0.00766, 0.0156] | 0.0135<br>[0.00959, 0.0176] | 0.0146<br>[0.0114, 0.0165] | 0.0144<br>[0.00766, 0.0176] |
|                                              |                   |                            |                             |                            |                             |                             |                            |                             |
| Cumulative rainfall<br>(mm - 4 months)       | Mean (SD)         | 0.386<br>(0.0724)          | 0.414<br>(0.0325)           | 0.435<br>(0.0485)          | 0.459<br>(0.0382)           | 0.380<br>(0.0519)           | 0.371<br>(0.0499)          | 0.408<br>(0.0597)           |
|                                              | Median [Min, Max] | 0.392<br>[0.219, 0.519]    | 0.408<br>[0.361, 0.496]     | 0.436<br>[0.279, 0.505]    | 0.466<br>[0.389, 0.539]     | 0.383<br>[0.221, 0.469]     | 0.387<br>[0.231, 0.457]    | 0.408<br>[0.219, 0.539]     |
|                                              |                   |                            |                             |                            |                             |                             |                            |                             |
| Minimum temperature<br>(°C – 4 months)       | Mean (SD)         | 382 (132)                  | 252 (110)                   | 353 (103)                  | 351 (119)                   | 483 (159)                   | 400 (124)                  | 370 (143)                   |
|                                              | Median [Min, Max] | 388 [60.0, 673]            | 260 [31.4, 648]             | 347 [125, 631]             | 342 [94.8, 659]             | 471 [121, 891]              | 385 [150, 781]             | 358 [31.4, 891]             |
|                                              |                   |                            |                             |                            |                             |                             |                            |                             |
| Maximum temperature<br>(°C – 4 months)       | Mean (SD)         | 21.1<br>(0.626)            | 14.5 (0.396)                | 17.7<br>(0.482)            | 16.2 (0.443)                | 17.5 (0.528)                | 19.5<br>(0.464)            | 17.8 (2.19)                 |
|                                              | Median [Min, Max] | 21.1 [20.1, 23.0]          | 14.5 [13.8, 15.7]           | 17.6 [16.9, 19.2]          | 16.2 [15.2, 17.5]           | 17.5 [15.9, 18.9]           | 19.5 [18.6, 21.0]          | 17.5 [13.8, 23.0]           |
|                                              |                   |                            |                             |                            |                             |                             |                            |                             |
| Humidity                                     | Mean (SD)         | 28.7 (1.25)                | 23.5 (0.500)                | 27.7<br>(0.881)            | 25.7 (0.448)                | 27.8 (0.961)                | 26.7<br>(0.676)            | 26.7 (1.89)                 |
|                                              | Median [Min, Max] | 28.3 [26.8, 32.0]          | 23.4 [22.4, 24.9]           | 27.5 [26.0, 30.2]          | 25.8 [24.6, 26.7]           | 27.6 [26.2, 30.4]           | 26.5 [25.5, 28.8]          | 26.9 [22.4, 32.0]           |
|                                              |                   |                            |                             |                            |                             |                             |                            |                             |

|                                                     |                               |                                |                               |                                |                               |                               |                                |
|-----------------------------------------------------|-------------------------------|--------------------------------|-------------------------------|--------------------------------|-------------------------------|-------------------------------|--------------------------------|
| <b>(kg.kg<sup>-1</sup> – 4 months)</b>              |                               |                                |                               |                                |                               |                               |                                |
| Mean (SD)                                           | 0.0146<br>(0.000670)          | 0.0133<br>(0.00199)            | 0.0145<br>(0.000866)          | 0.0129<br>(0.00176)            | 0.0134<br>(0.00154)           | 0.0145<br>(0.000869)          | 0.0139<br>(0.00154)            |
| Median [Min,<br>Max]                                | 0.0146<br>[0.0130,<br>0.0158] | 0.0141<br>[0.00891,<br>0.0164] | 0.0146<br>[0.0124,<br>0.0161] | 0.0136<br>[0.00892,<br>0.0155] | 0.0136<br>[0.0102,<br>0.0170] | 0.0145<br>[0.0122,<br>0.0163] | 0.0143<br>[0.00891,<br>0.0170] |
| <b>Enhanced<br/>vegetation index (4<br/>months)</b> |                               |                                |                               |                                |                               |                               |                                |
| Mean (SD)                                           | 0.385<br>(0.0506)             | 0.414<br>(0.0271)              | 0.435<br>(0.0358)             | 0.459<br>(0.0319)              | 0.380<br>(0.0375)             | 0.371<br>(0.0413)             | 0.407<br>(0.0495)              |
| Median [Min,<br>Max]                                | 0.391<br>[0.257,<br>0.519]    | 0.408<br>[0.366,<br>0.496]     | 0.439<br>[0.321,<br>0.505]    | 0.466<br>[0.390,<br>0.539]     | 0.381<br>[0.273,<br>0.469]    | 0.374<br>[0.275,<br>0.457]    | 0.407<br>[0.257,<br>0.539]     |

**Table S4.** - Summary of GLM negative binomial model without interaction.

| <b>Malaria weekly cases</b>  |                              |                                               |                                  |
|------------------------------|------------------------------|-----------------------------------------------|----------------------------------|
| <i>Predictors</i>            | <i>Incidence Rate Ratios</i> | <i>CI</i>                                     | <i>p</i>                         |
| IRS [Yes]                    | 0.37                         | 0.33 – 0.40                                   | <b>&lt; 2.20 e<sup>-16</sup></b> |
| LLIN [Yes]                   | 0.65                         | 0.62 – 0.68                                   | <b>&lt; 2.20 e<sup>-16</sup></b> |
| Average income               | 9.99 e <sup>-01</sup>        | 9.99 e <sup>-01</sup> – 9.99 e <sup>-01</sup> | <b>&lt; 2.20 e<sup>-16</sup></b> |
| Rainfall (mm) - 1            | 1.00                         | 0.99 – 1.00                                   | 0.104                            |
| Rainfall (mm) - 2            | 1.00                         | 0.99 – 1.00                                   | 0.4339                           |
| Minimum temperature (°C) - 1 | 1.40                         | 1.27 – 1.55                                   | <b>1.23 e<sup>-10</sup></b>      |
| Minimum temperature (°C) - 2 | 0.81                         | 0.74 – 0.90                                   | <b>0.000</b>                     |
| Maximum temperature (°C) - 1 | 0.70                         | 0.64 – 0.77                                   | <b>5.50 e<sup>-16</sup></b>      |
| Maximum temperature(°C) - 2  | 1.14                         | 1.08 – 1.21                                   | <b>4.96 e<sup>-06</sup></b>      |
| Humidity (kg.kg-1) - 1       | 6.88 e <sup>07</sup>         | 2.28 e <sup>-07</sup> – 2.28 e <sup>22</sup>  | 0.278                            |
| Humidity (kg.kg-1) - 2       | 9.99 e <sup>14</sup>         | 44.38 –2.07 e <sup>28</sup>                   | <b>0.028</b>                     |
| EVI -1                       | 42.8                         | 15.63 – 117.46                                | <b>3.07 e<sup>-13</sup></b>      |
| EVI - 2                      | 0.15                         | 0.04 – 0.48                                   | <b>0.001</b>                     |
| MRC*                         |                              |                                               |                                  |
| Kamwezi                      | 0.24                         | 0.17 – 0.34                                   | <b>&lt; 2.20 e<sup>-16</sup></b> |
| Kasambya                     | 1.01                         | 0.79 – 1.29                                   | 0.934                            |

|              |      |             |                                  |
|--------------|------|-------------|----------------------------------|
| Kihihi       | 0.83 | 0.63 – 1.09 | 0.175                            |
| Nagongera    | 0.75 | 0.59 – 0.95 | <b>0.019</b>                     |
| Walukuba     | 0.28 | 0.24 – 0.33 | <b>&lt; 2.20 e<sup>-16</sup></b> |
| Observations | 2787 |             |                                  |

\*Aduku is the reference

**Table S5.** – Differences between predictive margins at the mean with and without interventions for the pooled negative binomial model without interaction; adjusted for average monthly income.

| Variable                        | Predicted cases  |        |        | Difference in % between predictions without and with IRS | Difference in % between predictions without and with LLIN |
|---------------------------------|------------------|--------|--------|----------------------------------------------------------|-----------------------------------------------------------|
|                                 | No IRS / no LLIN | IRS    | LLIN   |                                                          |                                                           |
| Rain (mm)                       |                  |        |        |                                                          |                                                           |
| Min - 4.67                      | 97.11            | 35.21  | 62.99  | -63.74                                                   | -35.14                                                    |
| Q1 - 185.53                     | 89.51            | 32.45  | 58.05  | -63.75                                                   | -35.15                                                    |
| Q2 - 268.38                     | 85.71            | 31.07  | 55.58  | -63.75                                                   | -35.15                                                    |
| Q3 - 357.54                     | 80.86            | 29.31  | 52.44  | -63.75                                                   | -35.15                                                    |
| Max - 760.02                    | 59.90            | 21.71  | 38.85  | -63.76                                                   | -35.14                                                    |
| Minimum temperature (°C)        |                  |        |        |                                                          |                                                           |
| Min - 13.74                     | 25.80            | 9.35   | 16.73  | -63.76                                                   | -35.16                                                    |
| Q1 - 16.22                      | 58.31            | 21.14  | 37.81  | -63.75                                                   | -35.16                                                    |
| Q2 - 17.54                      | 81.62            | 29.59  | 52.93  | -63.75                                                   | -35.15                                                    |
| Q3 - 19.51                      | 105.89           | 38.39  | 68.67  | -63.75                                                   | -35.15                                                    |
| Max - 23.12                     | 128.69           | 46.65  | 83.46  | -63.75                                                   | -35.15                                                    |
| Maximum temperature (°C)        |                  |        |        |                                                          |                                                           |
| Min - 22.33                     | 345.28           | 125.17 | 223.92 | -63.75                                                   | -35.15                                                    |
| Q1 - 25.76                      | 108.48           | 39.33  | 70.36  | -63.74                                                   | -35.14                                                    |
| Q2 - 26.85                      | 82.46            | 29.89  | 53.48  | -63.75                                                   | -35.14                                                    |
| Q3 - 27.4                       | 69.46            | 25.18  | 45.05  | -63.75                                                   | -35.14                                                    |
| Max - 32.72                     | 39.57            | 14.34/ | 25.66  | -63.75                                                   | -35.15                                                    |
| Humidity (kg.kg <sup>-1</sup> ) |                  |        |        |                                                          |                                                           |
| Min - 0.82 x 10 <sup>-2</sup>   | 74.06            | 26.85  | 48.03  | -63.75                                                   | -35.15                                                    |
| Q1 - 1.31 x 10 <sup>-2</sup>    | 82.21            | 29.80  | 53.32  | -63.75                                                   | -35.14                                                    |
| Q2 - 1.43 x 10 <sup>-2</sup>    | 87.94            | 31.88  | 57.03  | -63.75                                                   | -35.15                                                    |
| Q3 - 1.50 x 10 <sup>-2</sup>    | 93.34            | 33.84  | 60.53  | -63.75                                                   | -35.15                                                    |
| Max - 1.72 x 10 <sup>-2</sup>   | 115.27           | 41.79  | 74.76  | -63.75                                                   | -35.14                                                    |
| EVI                             |                  |        |        |                                                          |                                                           |
| Min - 0.22                      | 44.43            | 16.11  | 28.81  | -63.74                                                   | -35.16                                                    |
| Q1 - 0.38                       | 78.03            | 28.29  | 50.60  | -63.74                                                   | -35.15                                                    |
| Q2 - 0.41                       | 85.18            | 30.88  | 55.24  | -63.75                                                   | -35.15                                                    |
| Q3 - 0.45                       | 90.84            | 32.93  | 58.91  | -63.75                                                   | -35.15                                                    |
| Max - 0.54                      | 98.31            | 35.64  | 63.76  | -63.75                                                   | -35.14                                                    |

**Table S6.** - Differences between predictive margins at the mean with and without interventions for the pooled negative binomial model with interaction; adjusted for average monthly income.

| Variable                        | Predicted cases  |        |        | Difference in % between predictions without and with IRS | Difference in % between predictions without and with LLIN |
|---------------------------------|------------------|--------|--------|----------------------------------------------------------|-----------------------------------------------------------|
|                                 | No IRS / no LLIN | IRS    | LLIN   |                                                          |                                                           |
| Rain (mm)                       |                  |        |        |                                                          |                                                           |
| Min - 4.67                      | 112.25           | 43.47  | 44.87  | -61.27                                                   | -60.03                                                    |
| Q1 - 185.53                     | 86.70            | 33.58  | 62.34  | -61.27                                                   | -28.10                                                    |
| Q2 - 268.38                     | 78.70            | 30.48  | 66.76  | -61.27                                                   | -15.17                                                    |
| Q3 - 357.54                     | 73.86            | 28.60  | 61.47  | -61.28                                                   | -16.77                                                    |
| Max - 760.02                    | 63.17            | 24.46  | 25.72  | -61.28                                                   | -59.28                                                    |
| Minimum temperature (°C)        |                  |        |        |                                                          |                                                           |
| Min - 13.74                     | 11.05            | 12.38  | 10.58  | 12.04                                                    | -4.25                                                     |
| Q1 - 16.22                      | 42.69            | 21.19  | 38.28  | -50.36                                                   | -10.33                                                    |
| Q2 - 17.54                      | 73.07            | 28.65  | 62.93  | -60.79                                                   | -13.88                                                    |
| Q3 - 19.51                      | 103.88           | 46.81  | 83.06  | -54.94                                                   | -20.04                                                    |
| Max - 23.12                     | 117.19           | 120.26 | 80.51  | 2.62                                                     | -31.30                                                    |
| Maximum temperature (°C)        |                  |        |        |                                                          |                                                           |
| Min - 22.33                     | 705.24           | 273.10 | 165.95 | -61.28                                                   | -76.47                                                    |
| Q1 - 25.76                      | 113.26           | 43.86  | 77.99  | -61.27                                                   | -31.14                                                    |
| Q2 - 26.85                      | 74.21            | 28.74  | 65.27  | -61.27                                                   | -12.05                                                    |
| Q3 - 27.4                       | 57.64            | 22.32  | 58.44  | -61.28                                                   | 1.39                                                      |
| Max - 32.72                     | 26.77            | 10.37  | 40.86  | -61.26                                                   | 52.63                                                     |
| Humidity (kg.kg <sup>-1</sup> ) |                  |        |        |                                                          |                                                           |
| Min - 0.82 x 10 <sup>-2</sup>   | 95.80            | 6.91   | 81.88  | -92.79                                                   | -14.53                                                    |
| Q1 - 1.31 x 10 <sup>-2</sup>    | 74.85            | 29.54  | 63.97  | -60.53                                                   | -14.54                                                    |
| Q2 - 1.43 x 10 <sup>-2</sup>    | 82.64            | 28.41  | 70.63  | -65.62                                                   | -14.53                                                    |
| Q3 - 1.50 x 10 <sup>-2</sup>    | 94.49            | 23.04  | 80.76  | -75.62                                                   | -14.53                                                    |
| Max - 1.72 x 10 <sup>-2</sup>   | 157.38           | 9.60   | 134.51 | -93.90                                                   | -14.53                                                    |
| EVI                             |                  |        |        |                                                          |                                                           |
| Min - 0.22                      | 60.03            | 20.70  | 30.38  | -65.52                                                   | -49.39                                                    |
| Q1 - 0.38                       | 75.33            | 27.43  | 59.88  | -63.59                                                   | -20.51                                                    |
| Q2 - 0.41                       | 78.00            | 30.18  | 66.63  | -61.31                                                   | -14.58                                                    |
| Q3 - 0.45                       | 79.92            | 36.56  | 72.28  | -54.25                                                   | -9.56                                                     |
| Max - 0.54                      | 82.11            | 62.07  | 80.45  | -24.41                                                   | -2.02                                                     |

**Table S7.** Difference between predictive margins at the mean with and without interventions based on a site-specific negative binomial model without interaction for Aduku malaria reference center (MRC); adjusted for average monthly income.

| Variable     | Predicted cases  |       |       | Difference in % between predictions without and with IRS | Difference in % between predictions without and with LLIN |
|--------------|------------------|-------|-------|----------------------------------------------------------|-----------------------------------------------------------|
|              | No LLIN / no IRS | IRS   | LLIN  |                                                          |                                                           |
| Rain (mm)    |                  |       |       |                                                          |                                                           |
| Min - 60.02  | 84.06            | 47.45 | 76.54 | -43.55                                                   | -8.95                                                     |
| Q1 - 293.96  | 83.17            | 46.95 | 75.73 | -43.55                                                   | -8.95                                                     |
| Q2 - 388.40  | 82.81            | 46.75 | 75.40 | -43.55                                                   | -8.95                                                     |
| Q3 - 465.95  | 82.51            | 46.58 | 75.13 | -43.55                                                   | -8.94                                                     |
| Max - 672.89 | 81.73            | 46.14 | 74.42 | -43.55                                                   | -8.94                                                     |

|                                      |        |        |        |        |       |
|--------------------------------------|--------|--------|--------|--------|-------|
| <b>Minimum temperature</b>           |        |        |        |        |       |
| <b>(°C)</b>                          |        |        |        |        |       |
| Min - 20.06                          | 108.34 | 61.16  | 98.65  | -43.55 | -8.94 |
| Q1 - 20.66                           | 87.08  | 46.16  | 79.26  | -46.99 | -8.98 |
| Q2 - 21.07                           | 82.58  | 46.62  | 75.19  | -43.55 | -8.95 |
| Q3 - 21.51                           | 90.89  | 51.31  | 82.76  | -43.55 | -8.94 |
| Max - 22.95                          | 253.81 | 143.28 | 231.10 | -43.55 | -8.95 |
| <b>Maximum temperature</b>           |        |        |        |        |       |
| <b>(°C)</b>                          |        |        |        |        |       |
| Min - 26.80                          | 54.64  | 30.85  | 49.75  | -43.54 | -8.95 |
| Q1 - 27.65                           | 70.85  | 40.00  | 64.51  | -43.54 | -8.95 |
| Q2 - 28.32                           | 80.86  | 45.65  | 73.62  | -43.54 | -8.95 |
| Q3 - 29.58                           | 76.95  | 43.44  | 70.06  | -43.55 | -8.95 |
| Max - 32.03                          | 34.50  | 19.48  | 31.42  | -43.54 | -8.93 |
| <b>Humidity (kg.kg<sup>-1</sup>)</b> |        |        |        |        |       |
| Min - $1.3 \times 10^{-2}$           | 108.00 | 60.97  | 98.34  | -43.55 | -8.94 |
| Q1 - $1.4 \times 10^{-2}$            | 89.09  | 50.30  | 81.12  | -43.54 | -8.95 |
| Q2 - $1.5 \times 10^{-2}$            | 82.59  | 46.62  | 75.20  | -43.55 | -8.95 |
| Q3 - $1.5 \times 10^{-2}$            | 76.10  | 42.96  | 69.29  | -43.55 | -8.95 |
| Max - $1.6 \times 10^{-2}$           | 68.54  | 38.69  | 62.41  | -43.55 | -8.94 |
| <b>EVI</b>                           |        |        |        |        |       |
| Min - 0.26                           | 50.80  | 28.68  | 46.26  | -43.54 | -8.94 |
| Q1 - 0.35                            | 72.50  | 40.93  | 66.02  | -43.54 | -8.94 |
| Q2 - 0.39                            | 84.60  | 47.76  | 77.03  | -43.55 | -8.95 |
| Q3 - 0.41                            | 92.21  | 52.05  | 83.96  | -43.55 | -8.95 |
| Max - 0.52                           | 138.19 | 78.01  | 125.83 | -43.55 | -8.94 |

**Table S8.** - Difference between adjusted predictions with and without interventions based on a site-specific negative binomial model without interaction for Kamwezi MRC; adjusted for average monthly income.

| Variable                        | Predicted cases |       | Difference in % between<br>predictions without and with LLIN |
|---------------------------------|-----------------|-------|--------------------------------------------------------------|
|                                 | No LLIN         | LLIN  |                                                              |
| <b>Rain (mm)</b>                |                 |       |                                                              |
| Min - 31.38                     | 32.87           | 9.20  | -72.01                                                       |
| Q1 - 172.00                     | 50.43           | 14.12 | -72.00                                                       |
| Q2 - 259.91                     | 53.71           | 15.04 | -72.00                                                       |
| Q3 - 314.33                     | 48.92           | 13.70 | -71.93                                                       |
| Max - 648.46                    | 6.02            | 1.69  |                                                              |
| <b>Minimum temperature (°C)</b> |                 |       |                                                              |
| Min – 13.81                     | 20.43           | 5.72  | -72.00                                                       |
| Q1 – 14.23                      | 35.55           | 9.95  | -72.01                                                       |
| Q2 – 14.50                      | 51.31           | 14.36 | -72.01                                                       |
| Q3 – 14.77                      | 73.35           | 20.53 | -72.01                                                       |
| Max – 15.67                     | 242.98          | 68.02 | -72.01                                                       |
| <b>Maximum temperature (°C)</b> |                 |       |                                                              |



|                                      |        |       |        |
|--------------------------------------|--------|-------|--------|
| Min – 22.37                          | 125.22 | 35.06 | -72.00 |
| Q1 – 23.14                           | 70.22  | 19.66 | -72.00 |
| Q2 – 23.43                           | 56.48  | 15.81 | -72.01 |
| Q3 – 23.85                           | 41.20  | 11.53 | -72.01 |
| Max – 24.88                          | 19.07  | 5.34  | -72.00 |
| <b>Humidity (kg.kg<sup>-1</sup>)</b> |        |       |        |
| Min – 0.08 x 10 <sup>-2</sup>        | 81.29  | 22.76 | -72.00 |
| Q1 – 1.15 x 10 <sup>-2</sup>         | 49.84  | 13.95 | -72.01 |
| Q2 – 1.40 x 10 <sup>-2</sup>         | 47.71  | 13.36 | -72.00 |
| Q3 – 1.51 x 10 <sup>-2</sup>         | 45.51  | 12.74 | -72.01 |
| Max – 1.64 x 10 <sup>-2</sup>        | 40.61  | 11.37 | -72.00 |
| <b>EVI</b>                           |        |       |        |
| Min – 0.37                           | 13.49  | 3.78  | -71.98 |
| Q1 – 0.40                            | 37.97  | 10.63 | -72.00 |
| Q2 – 0.41                            | 48.66  | 13.62 | -72.01 |
| Q3 – 0.43                            | 63.06  | 17.65 | -72.01 |
| Max – 0.50                           | 33.38  | 9.48  | -71.60 |

**Table S9.** - Difference between predictive margins at the mean with and without interventions based on a site-specific negative binomial model without interaction for Kasambya MRC; adjusted for average monthly income.

| Variable                        | Predicted cases |        | Difference in % between predictions without and with LLIN |
|---------------------------------|-----------------|--------|-----------------------------------------------------------|
|                                 | No LLIN         | LLIN   |                                                           |
| Rain (mm)                       |                 |        |                                                           |
| Min – 125.37                    | 45.71           | 42.95  | -6.04                                                     |
| Q1 – 280.07                     | 73.14           | 68.73  | -6.03                                                     |
| Q2 - 346.91                     | 84.38           | 79.29  | -6.03                                                     |
| Q3 - 421.60                     | 92.40           | 86.83  | -6.03                                                     |
| Max - 630.62                    | 93.09           | 87.47  | -6.04                                                     |
| Minimum temperature (°C)        |                 |        |                                                           |
| Min – 16.87                     | 84.59           | 79.48  | -6.04                                                     |
| Q1 – 17.25                      | 84.88           | 79.76  | -6.03                                                     |
| Q2 – 17.60                      | 85.15           | 80.01  | -6.04                                                     |
| Q3 – 17.98                      | 85.44           | 80.29  | -6.03                                                     |
| Max – 19.21                     | 86.39           | 81.18  | -6.03                                                     |
| Maximum temperature (°C)        |                 |        |                                                           |
| Min – 25.96                     | 74.97           | 70.45  | -6.03                                                     |
| Q1 – 27.07                      | 85.10           | 79.96  | -6.04                                                     |
| Q2 – 27.50                      | 85.84           | 80.66  | -6.03                                                     |
| Q3 – 28.21                      | 80.67           | 75.80  | -6.04                                                     |
| Max – 30.21                     | 48.79           | 45.85  | -6.03                                                     |
| Humidity (kg.kg <sup>-1</sup> ) |                 |        |                                                           |
| Min – 1.24 x 10 <sup>-2</sup>   | 111.27          | 104.56 | -6.03                                                     |
| Q1 – 1.39 x 10 <sup>-2</sup>    | 86.77           | 81.54  | -6.03                                                     |
| Q2 – 1.46 x 10 <sup>-2</sup>    | 85.51           | 80.35  | -6.03                                                     |
| Q3 - 1.51 x 10 <sup>-2</sup>    | 90.73           | 85.26  | -6.03                                                     |
| Max - 1.61 x 10 <sup>-2</sup>   | 110.77          | 104.09 | -6.03                                                     |
| EVI                             |                 |        |                                                           |
| Min – 0.32                      | 33.45           | 31.43  | -6.04                                                     |
| Q1 – 0.42                       | 80.13           | 75.30  | -6.03                                                     |
| Q2 – 0.44                       | 85.82           | 80.65  | -6.02                                                     |

|            |       |       |       |
|------------|-------|-------|-------|
| Q3 – 0.46  | 85.15 | 80.02 | -6.02 |
| Max – 0.50 | 74.21 | 69.73 | -6.04 |

**Table S10.** - Difference between predictive margins at the mean with and without interventions based on a site-specific negative binomial model without interaction for Kihikihi MRC; adjusted for average monthly income.

| Variable                        | Predicted cases |        | Difference in % between predictions without and with LLIN |
|---------------------------------|-----------------|--------|-----------------------------------------------------------|
|                                 | No LLIN         | LLIN   |                                                           |
| Rain (mm)                       |                 |        |                                                           |
| Min – 9.63                      | 127.22          | 84.05  | -33.93                                                    |
| Q1 – 103.47                     | 106.30          | 70.23  | -33.93                                                    |
| Q2 – 175.15                     | 94.99           | 62.76  | -33.93                                                    |
| Q3 – 242.72                     | 88.33           | 58.36  | -33.93                                                    |
| Max – 463.86                    | 80.89           | 53.44  | -33.93                                                    |
| Minimum temperature (°C)        |                 |        |                                                           |
| Min – 14.9                      | 49.32           | 32.59  | -33.92                                                    |
| Q1 – 15.93                      | 80.53           | 53.21  | -33.93                                                    |
| Q2 – 16.26                      | 95.88           | 63.35  | -33.93                                                    |
| Q3 – 16.56                      | 111.92          | 73.95  | -33.93                                                    |
| Max – 17.67                     | 199.72          | 131.95 | -33.93                                                    |
| Maximum temperature (°C)        |                 |        |                                                           |
| Min – 24.50                     | 154.29          | 101.94 | -33.93                                                    |
| Q1 – 25.35                      | 111.33          | 73.56  | -33.93                                                    |
| Q2 – 25.80                      | 93.59           | 61.84  | -33.92                                                    |
| Q3 – 26.18                      | 80.62           | 53.27  | -33.92                                                    |
| Max – 27.33                     | 51.87           | 34.27  | -33.93                                                    |
| Humidity (kg.kg <sup>-1</sup> ) |                 |        |                                                           |
| Min – 0.77                      | 128.52          | 84.91  | -33.93                                                    |
| Q1 – 1.11                       | 105.31          | 69.58  | -33.93                                                    |
| Q2 – 1.4                        | 89.75           | 59.30  | -33.93                                                    |
| Q3 – 1.5                        | 86.63           | 57.24  | -33.93                                                    |
| Max – 1.6                       | 81.22           | 53.66  | -33.93                                                    |
| EVI                             |                 |        |                                                           |
| Min – 0.39                      | 88.27           | 58.32  | -33.93                                                    |
| Q1 – 0.43                       | 95.17           | 62.88  | -33.93                                                    |
| Q2 – 0.47                       | 90.74           | 59.95  | -33.93                                                    |
| Q3 – 0.48                       | 94.15           | 62.20  | -33.94                                                    |
| Max – 0.54                      | 69.38           | 45.84  | -33.93                                                    |

**Table S11.** - Difference between predictive margins at the mean with and without interventions based on a site-specific negative binomial model without interaction for Nagongera MRC; adjusted for average monthly income.

| Variable                        | Predicted cases  |       |        | Difference between predictions without and with IRS | Difference between predictions without and with LLIN |
|---------------------------------|------------------|-------|--------|-----------------------------------------------------|------------------------------------------------------|
|                                 | No LLIN / no IRS | IRS   | LLIN   |                                                     |                                                      |
| Rain (mm)                       |                  |       |        |                                                     |                                                      |
| Min – 121.41                    | 22.05            | 5.74  | 23.67  | -73.97                                              | 7.35                                                 |
| Q1 – 361.95                     | 59.92            | 15.60 | 64.32  | -73.97                                              | 7.34                                                 |
| Q2 – 470.59                     | 79.60            | 20.72 | 85.44  | -73.97                                              | 7.34                                                 |
| Q3 – 604.78                     | 89.93            | 23.41 | 96.52  | -73.97                                              | 7.33                                                 |
| Max – 891.27                    | 68.69            | 17.88 | 73.73  | -73.97                                              | 7.34                                                 |
| Minimum temperature (°C)        |                  |       |        |                                                     |                                                      |
| Min – 15.90                     | 178.92           | 46.58 | 192.05 | -73.97                                              | 7.34                                                 |
| Q1 – 17.19                      | 84.66            | 22.04 | 90.87  | -73.97                                              | 7.34                                                 |
| Q2 – 17.48                      | 81.35            | 21.19 | 87.35  | -73.95                                              | 7.38                                                 |
| Q3 – 17.89                      | 87.07            | 22.67 | 93.46  | -73.96                                              | 7.34                                                 |
| Max – 18.94                     | 157.52           | 41.01 | 169.08 | -73.97                                              | 7.34                                                 |
| Maximum temperature (°C)        |                  |       |        |                                                     |                                                      |
| Min – 22.18                     | 60.13            | 15.65 | 64.54  | -73.97                                              | 7.33                                                 |
| Q1 – 27.08                      | 71.11            | 18.51 | 76.32  | -73.97                                              | 7.33                                                 |
| Q2 – 27.55                      | 77.62            | 20.21 | 83.32  | -73.96                                              | 7.34                                                 |
| Q3 – 28.49                      | 92.42            | 24.06 | 99.20  | -73.97                                              | 7.34                                                 |
| Max – 30.37                     | 131.35           | 34.20 | 140.99 | -73.96                                              | 7.34                                                 |
| Humidity (kg.kg <sup>-1</sup> ) |                  |       |        |                                                     |                                                      |
| Min – 1.02                      | 80.80            | 21.04 | 86.73  | -73.96                                              | 7.34                                                 |
| Q1 – 1.22                       | 81.17            | 21.13 | 87.12  | -73.97                                              | 7.33                                                 |
| Q2 – 1.36                       | 81.41            | 21.20 | 87.39  | -73.96                                              | 7.35                                                 |
| Q3 – 1.45                       | 81.57            | 21.24 | 87.55  | -73.96                                              | 7.33                                                 |
| Max – 1.70                      | 82.02            | 21.35 | 88.04  | -73.97                                              | 7.34                                                 |
| EVI                             |                  |       |        |                                                     |                                                      |
| Min – 0.27                      | 67.68            | 17.62 | 72.64  | -73.97                                              | 7.33                                                 |
| Q1 – 0.36                       | 78.92            | 20.55 | 84.71  | -73.96                                              | 7.34                                                 |
| Q2 – 0.38                       | 81.56            | 21.23 | 87.54  | -73.97                                              | 7.33                                                 |
| Q3 – 0.41                       | 85.33            | 22.22 | 91.59  | -73.96                                              | 7.34                                                 |
| Max – 0.47                      | 94.93            | 24.71 | 101.89 | -73.97                                              | 7.33                                                 |

**Table S12.** - Difference between predictive margins at the mean with and without interventions based on a site-specific negative binomial model without interaction for Walukuba MRC; adjusted for average monthly income.

| Variable                        | Predicted cases |       | Difference in % between<br>predictions without and with LLIN |
|---------------------------------|-----------------|-------|--------------------------------------------------------------|
|                                 | No LLIN         | LLIN  |                                                              |
| Rain (mm)                       |                 |       |                                                              |
| Min - 149.98                    | 125.81          | 65.43 | -47.99                                                       |
| Q1 – 308.88                     | 104.67          | 54.44 | -47.99                                                       |
| Q2 – 384.57                     | 95.89           | 49.87 | -47.99                                                       |
| Q3 – 480.53                     | 85.80           | 44.63 | -47.98                                                       |
| Max – 780.87                    | 60.61           | 31.52 | -48.00                                                       |
| Minimum temperature (°C)        |                 |       |                                                              |
| Min – 18.62                     | 71.79           | 37.34 | -47.99                                                       |
| Q1 – 19.20                      | 88.24           | 45.89 | -47.99                                                       |
| Q2 – 19.51                      | 93.92           | 48.85 | -47.99                                                       |
| Q3 – 19.86                      | 94.02           | 48.90 | -47.99                                                       |
| Max – 20.96                     | 69.25           | 36.02 | -47.99                                                       |
| Maximum temperature (°C)        |                 |       |                                                              |
| Min – 25.46                     | 137.47          | 71.50 | -47.99                                                       |
| Q1 – 26.20                      | 109.92          | 57.17 | -47.99                                                       |
| Q2 – 26.55                      | 99.20           | 51.60 | -47.98                                                       |
| Q3 – 27.15                      | 82.76           | 43.05 | -47.98                                                       |
| Max – 28.75                     | 51.24           | 26.65 | -47.99                                                       |
| Humidity (kg.kg <sup>-1</sup> ) |                 |       |                                                              |
| Min – 1.22 x 10 <sup>-2</sup>   | 44.29           | 23.03 | -48.00                                                       |
| Q1 – 1.39 x 10 <sup>-2</sup>    | 81.89           | 42.59 | -47.99                                                       |
| Q2 – 1.45 x 10 <sup>-2</sup>    | 96.12           | 49.99 | -47.99                                                       |
| Q3 – 1.50 x 10 <sup>-2</sup>    | 104.55          | 54.38 | -47.99                                                       |
| Max – 1.63 x 10 <sup>-2</sup>   | 113.59          | 59.08 | -47.99                                                       |
| EVI                             |                 |       |                                                              |
| Min – 0.27                      | 75.48           | 39.26 | -47.99                                                       |
| Q1 – 0.35                       | 88.95           | 46.27 | -47.98                                                       |
| Q2 – 0.37                       | 94.80           | 49.31 | -47.99                                                       |
| Q3 – 0.40                       | 101.03          | 52.55 | -47.99                                                       |
| Max – 0.46                      | 114.54          | 59.57 | -47.99                                                       |

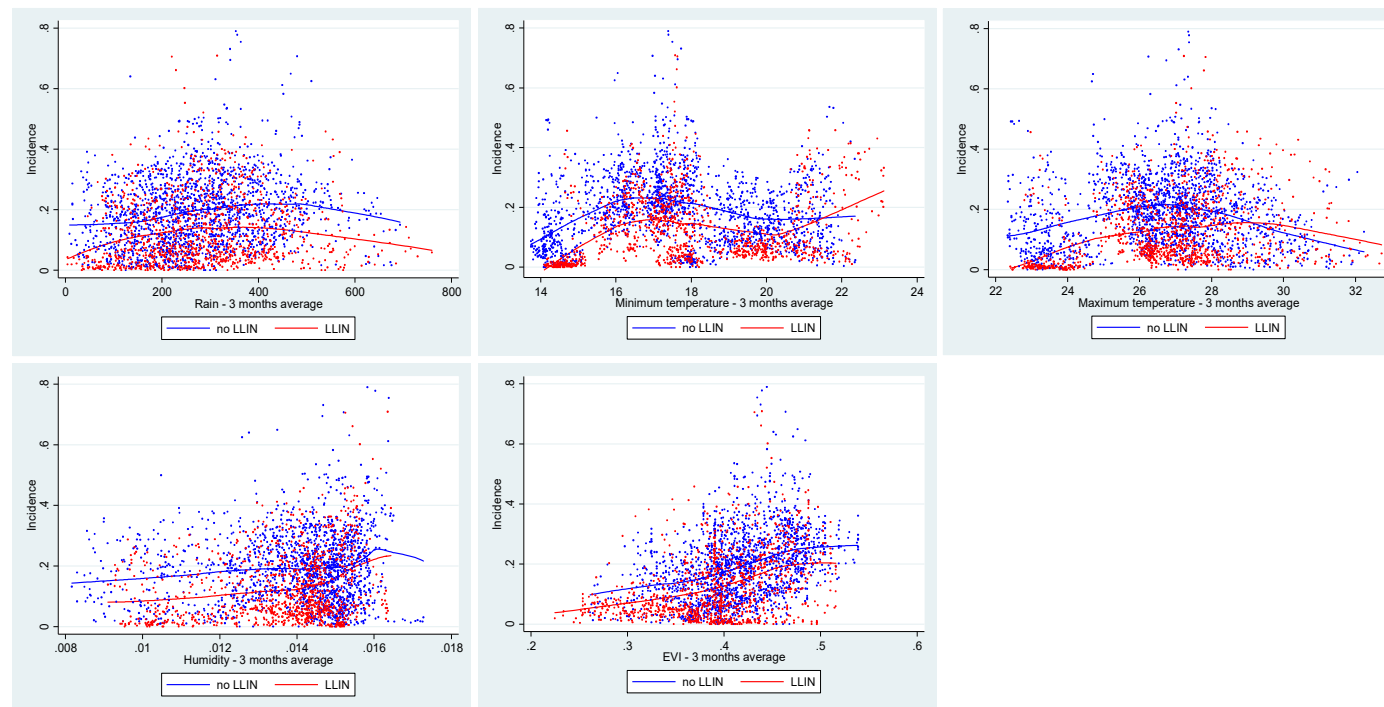

**Figure S1.** – LOWESS plots of the relationship between malaria incidence and environmental variables, with and without LLIN.

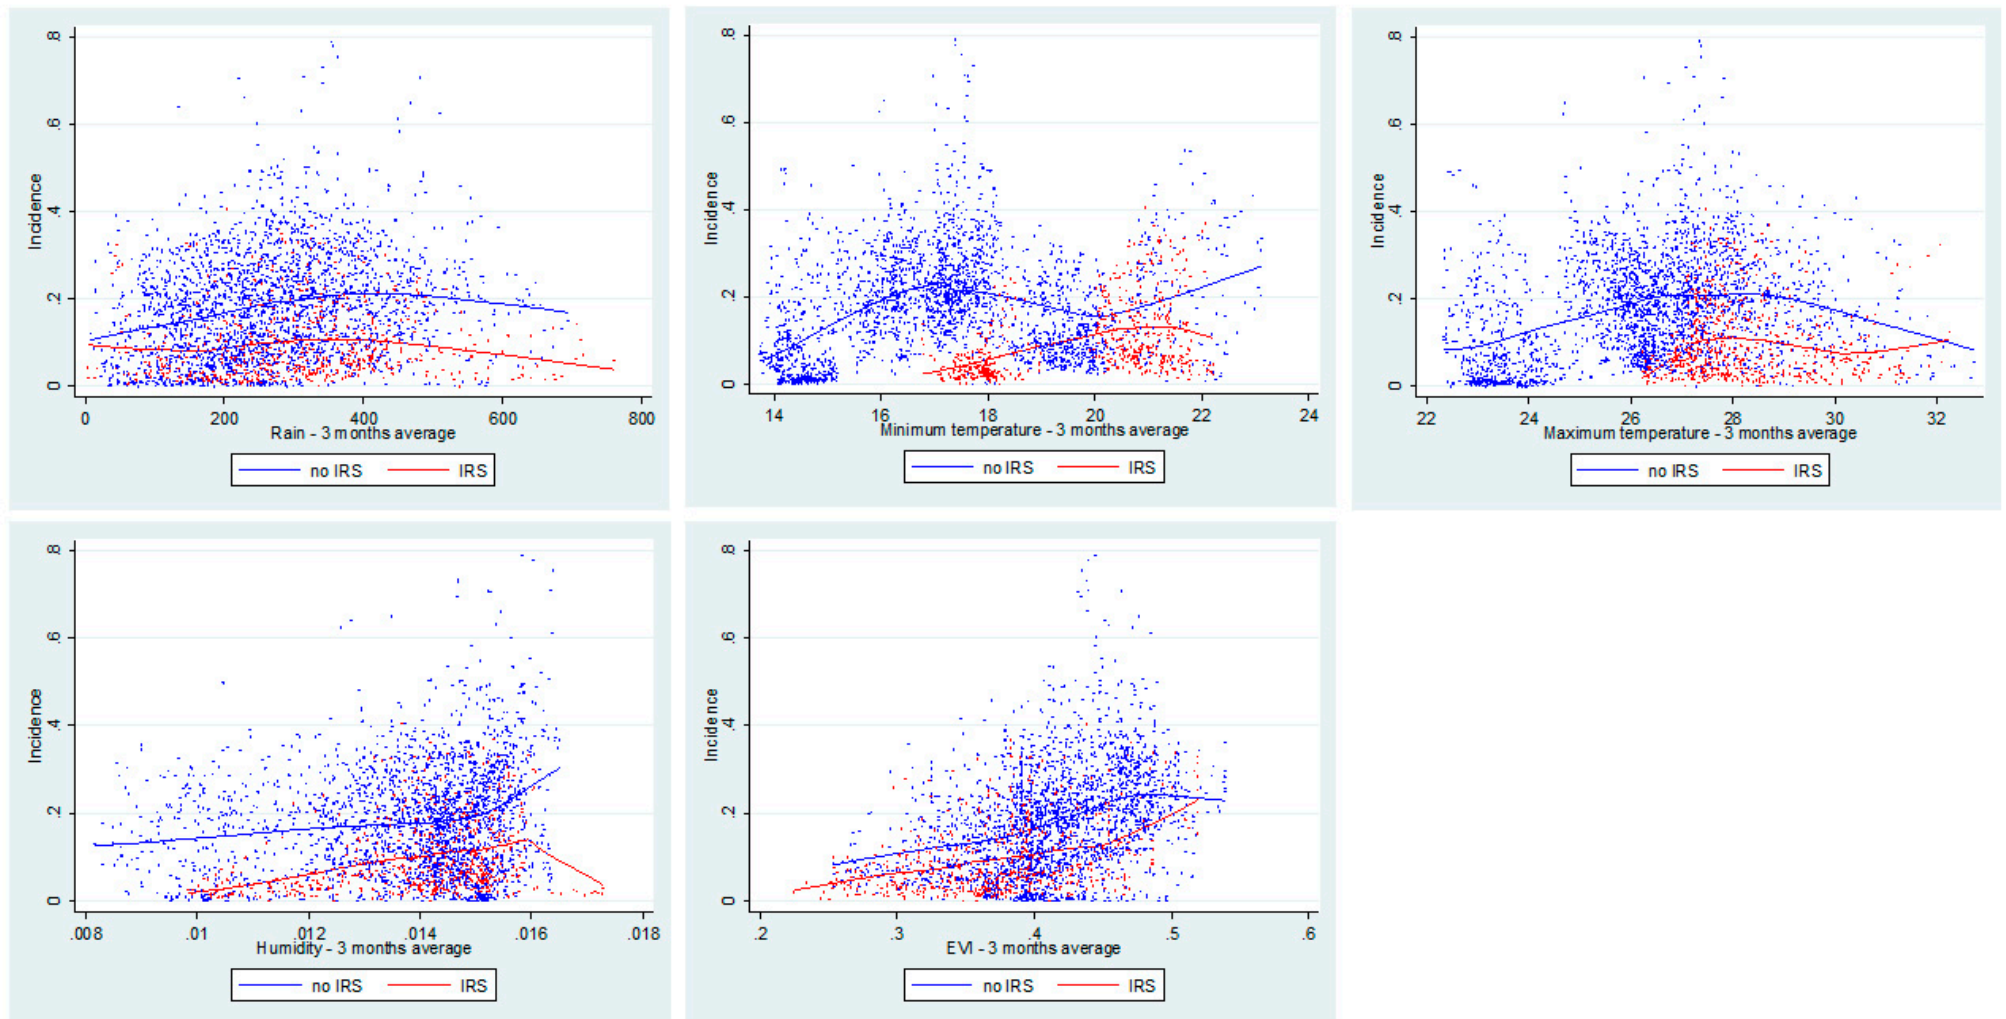

**Figure S2.** – LOWESS plots of the relationship between malaria incidence and environmental variables, with and without IRS.

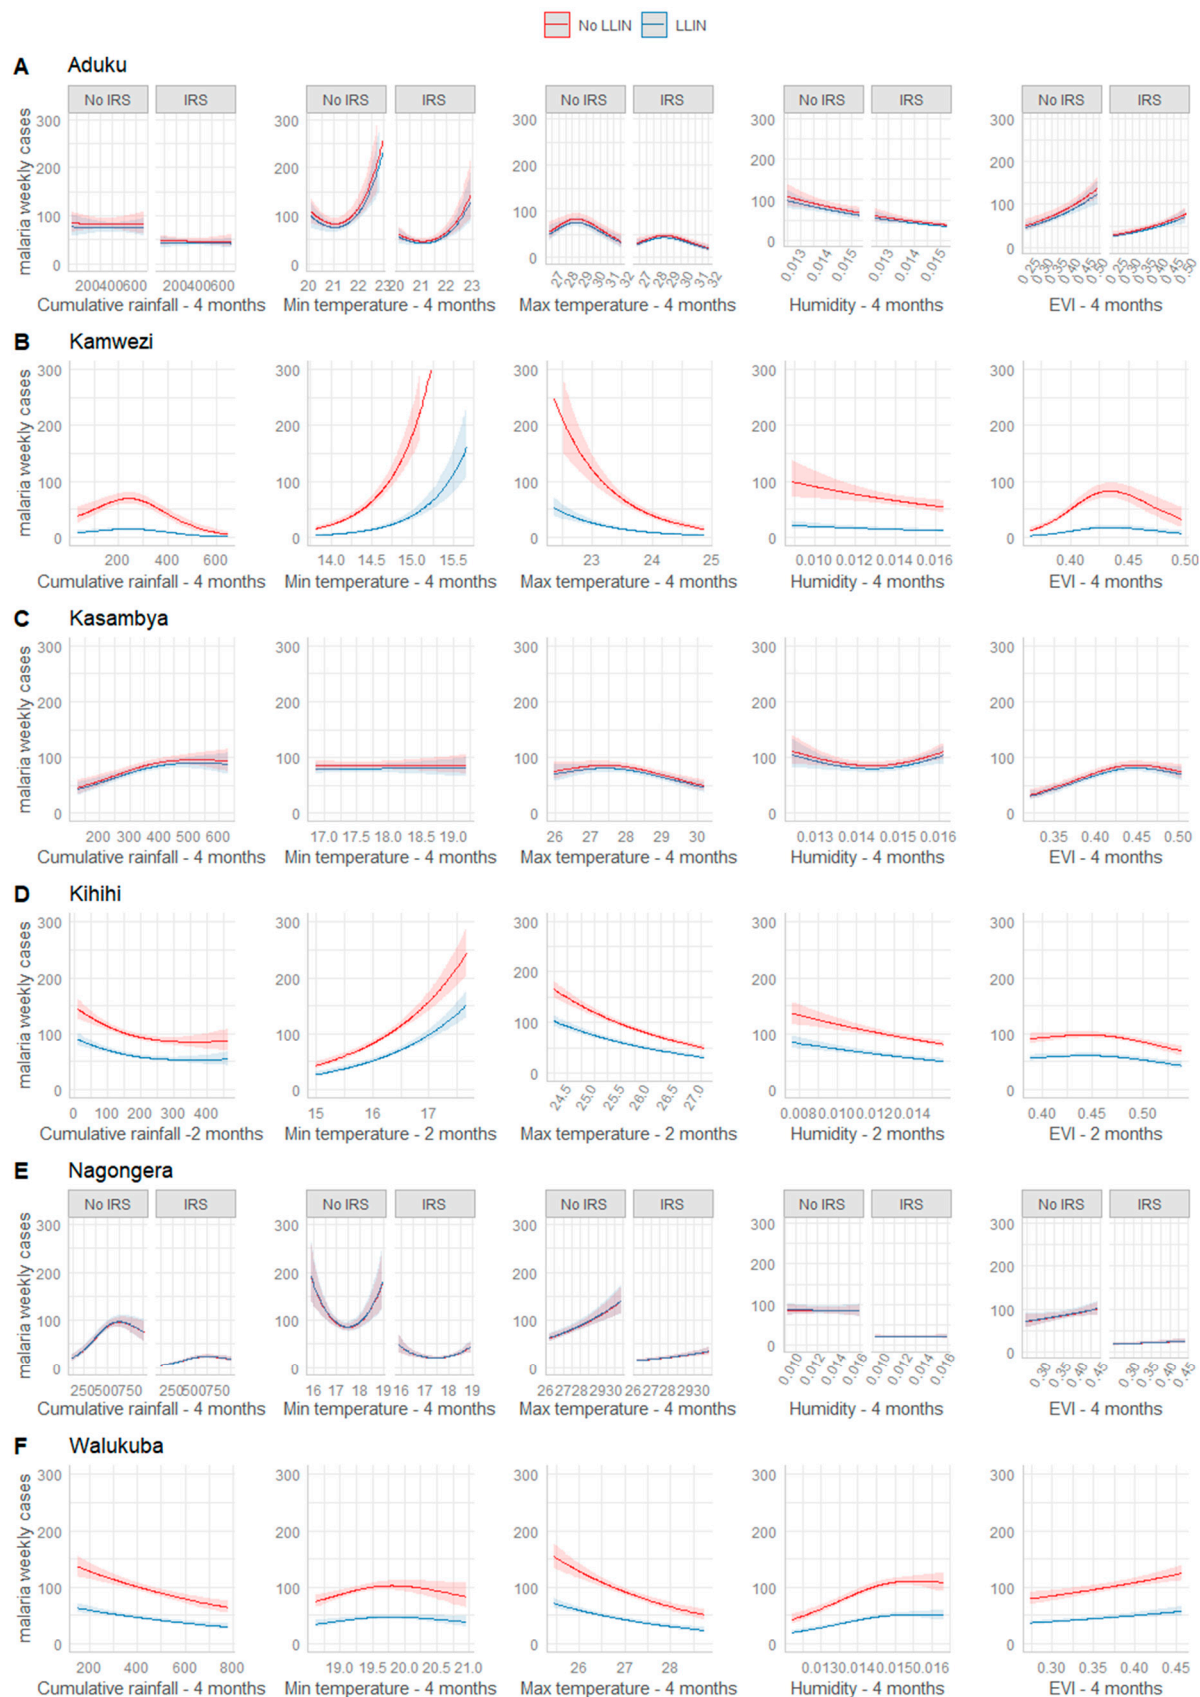

**Figure S3.** - Weekly predictive margins based on site specific models (A: Aduku, B: Kamwezi, C: Kasambya, D: Kihikihi, E: Nagongera, F: Walukuba); predictive margins are based on a negative binomial model without interaction,

adjusted for average monthly income.

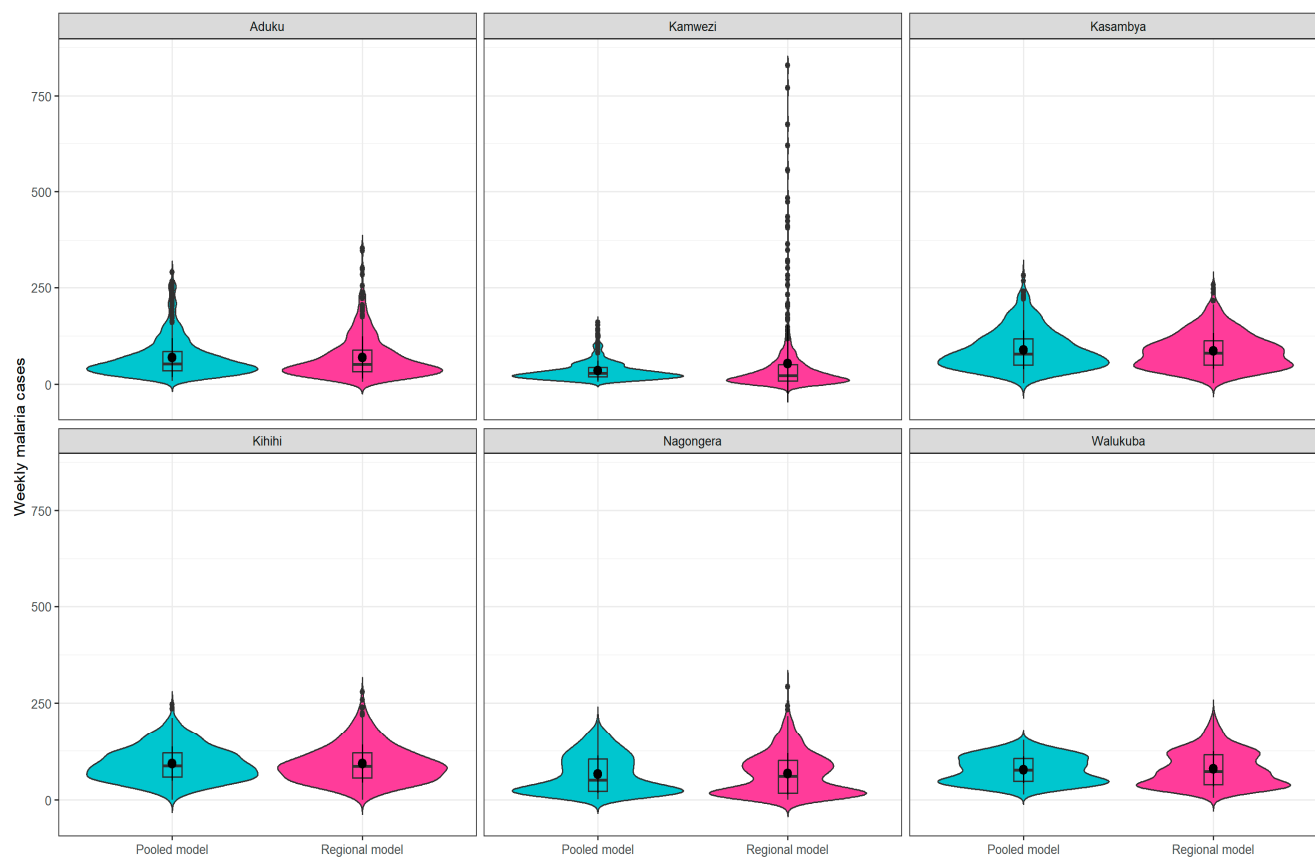

**Figure S4.** - Comparison of the weekly malaria predictions for each site from the pooled model without interaction versus the site-specific models; (N=53 weeks\*6 regions \*9 years).
